# Supplementary material for: Local adaptations in bryophytes revisited: the genetic structure of the calcium-tolerant peatmoss Sphagnum warnstorfii along geographic and pH gradients
Source: PubMed Central journal article supplement (PMC4298450; doi:10.1002/ece3.1351), 2014-12-19
Supplement: ece30005-0229-sd1.pdf [file ece30005-0229-sd1.pdf]

| Isolation number | Locality name                               | Nr. of alleles per loci | Microsatellite alleles |     |     |     |     |     |     |     |     |     |     |
|------------------|---------------------------------------------|-------------------------|------------------------|-----|-----|-----|-----|-----|-----|-----|-----|-----|-----|
|                  |                                             |                         | 22                     | 10  | 18  | 1   | 9   | 30  | 19  | 14  | 17  | 20  | 29  |
|                  |                                             |                         | 5                      | 19  | 7   | 3   | 15  | 6   | 9   | 23  | 5   | 6   | 7   |
| EM_328           | Central Rhodopes – Near the jazovir Beglika |                         | 102                    | 244 | 135 | 248 | 172 | 140 | 261 | 189 | 155 | 290 | 201 |
| EM_329           | Central Rhodopes – Near the jazovir Beglika |                         | 102                    | 244 | 135 | 248 | 172 | 140 | 261 | 189 | 155 | 290 | 201 |
| EM_330           | Central Rhodopes – Near the jazovir Beglika |                         | 102                    | 244 | 135 | 248 | 172 | 140 | 261 | 189 | 155 | 290 | 201 |
| EM_331           | Central Rhodopes – Near the jazovir Beglika |                         | 102                    | 244 | 135 | 248 | 172 | 140 | 261 | 189 | 155 | 290 | 201 |
| EM_332           | Central Rhodopes – Near the jazovir Beglika |                         | 102                    | 244 | 135 | 248 | 172 | 140 | 261 | 189 | 155 | 290 | 201 |
| EM_378           | Pirin – Izvorite                            |                         | 102                    | 240 | 138 | 248 | 197 | 140 | 272 | 219 | 155 | 286 | 198 |
| EM_379           | Pirin – Izvorite                            |                         | 102                    | 240 | 138 | 248 | 0   | 140 | 272 | 219 | 155 | 286 | 201 |
| EM_293           | Pirin – NW from Bezbog, Disilishko reka     |                         | 99                     | 240 | 129 | 248 | 172 | 140 | 268 | 241 | 0   | 0   | 0   |
| EM_294           | Pirin – NW from Bezbog, Disilishko reka     |                         | 99                     | 240 | 129 | 248 | 172 | 140 | 268 | 241 | 0   | 0   | 0   |
| EM_295           | Pirin – NW from Bezbog, Disilishko reka     |                         | 99                     | 240 | 129 | 248 | 172 | 140 | 268 | 243 | 155 | 290 | 201 |
| EM_296           | Pirin – NW from Bezbog, Disilishko reka     |                         | 99                     | 240 | 129 | 248 | 172 | 140 | 268 | 243 | 155 | 290 | 201 |
| EM_297           | Pirin – NW from Bezbog, Disilishko reka     |                         | 99                     | 240 | 129 | 248 | 172 | 140 | 268 | 249 | 155 | 290 | 201 |
| EM_298           | Pirin, Golyamo Valyavishko ozero            |                         | 102                    | 235 | 144 | 248 | 172 | 140 | 268 | 189 | 155 | 290 | 201 |
| EM_299           | Pirin, Golyamo Valyavishko ozero            |                         | 102                    | 235 | 144 | 248 | 172 | 140 | 268 | 189 | 155 | 290 | 201 |
| EM_300           | Pirin, Golyamo Valyavishko ozero            |                         | 102                    | 235 | 0   | 0   | 0   | 140 | 268 | 0   | 155 | 290 | 201 |
| EM_301           | Pirin, Golyamo Valyavishko ozero            |                         | 102                    | 235 | 0   | 0   | 0   | 0   | 0   | 0   | 155 | 290 | 201 |
| EM_302           | Pirin, Golyamo Valyavishko ozero            |                         | 102                    | 235 | 0   | 0   | 0   | 140 | 268 | 0   | 155 | 290 | 201 |
| EM_359           | Rila – Govedartsi                           |                         | 99                     | 242 | 132 | 248 | 172 | 140 | 272 | 207 | 157 | 286 | 201 |
| EM_360           | Rila – Govedartsi                           |                         | 99                     | 242 | 132 | 248 | 172 | 140 | 272 | 207 | 157 | 286 | 201 |
| EM_361           | Rila – Govedartsi                           |                         | 99                     | 242 | 132 | 248 | 172 | 140 | 272 | 207 | 157 | 286 | 201 |
| EM_376           | Rila – Kazanishka reka (Kostenecki Balkan)  |                         | 102                    | 242 | 144 | 248 | 176 | 140 | 272 | 221 | 155 | 290 | 201 |
| EM_377           | Rila – Kazanishka reka (Kostenecki Balkan)  |                         | 102                    | 242 | 144 | 248 | 176 | 140 | 272 | 221 | 155 | 290 | 201 |
| EM_303           | Rila – Malyovitsa                           |                         | 102                    | 244 | 138 | 248 | 176 | 140 | 272 | 217 | 0   | 0   | 0   |
| EM_304           | Rila – Malyovitsa                           |                         | 102                    | 244 | 138 | 248 | 176 | 140 | 272 | 217 | 155 | 290 | 201 |
| EM_305           | Rila – Malyovitsa                           |                         | 102                    | 244 | 138 | 248 | 176 | 140 | 272 | 217 | 155 | 290 | 201 |
| EM_306           | Rila – Malyovitsa                           |                         | 102                    | 244 | 0   | 0   | 0   | 140 | 272 | 217 | 155 | 290 | 201 |
| EM_307           | Rila – Malyovitsa                           |                         | 102                    | 244 | 0   | 0   | 0   | 140 | 272 | 217 | 155 | 290 | 201 |
| EM_289           | Rila – Sedemse Ozera                        |                         | 102                    | 244 | 0   | 0   | 0   | 140 | 272 | 219 | 155 | 290 | 201 |
| EM_290           | Rila – Sedemse Ozera                        |                         | 102                    | 244 | 0   | 0   | 0   | 140 | 272 | 219 | 155 | 290 | 201 |
| EM_291           | Rila – Sedemse Ozera                        |                         | 102                    | 244 | 0   | 0   | 0   | 140 | 272 | 219 | 0   | 0   | 0   |
| EM_292           | Rila – Sedemse Ozera                        |                         | 102                    | 244 | 138 | 248 | 176 | 140 | 272 | 219 | 155 | 290 | 201 |
| EM_308           | Stara Planina – Botev, Kafadikildi          |                         | 102                    | 225 | 144 | 248 | 172 | 140 | 272 | 209 | 155 | 293 | 201 |
| EM_309           | Stara Planina – Botev, Kafadikildi          |                         | 102                    | 225 | 144 | 248 | 172 | 140 | 272 | 209 | 155 | 293 | 201 |
| EM_310           | Stara Planina – Botev, Kafadikildi          |                         | 102                    | 225 | 144 | 248 | 172 | 140 | 272 | 209 | 155 | 293 | 201 |
| EM_311           | Stara Planina – Botev, Kafadikildi          |                         | 102                    | 225 | 144 | 248 | 172 | 140 | 272 | 209 | 155 | 293 | 201 |
| EM_312           | Stara Planina – Botev, Kafadikildi          |                         | 102                    | 225 | 144 | 248 | 172 | 140 | 272 | 209 | 0   | 0   | 0   |
| EM_313           | Stara Planina – Vartopa (pod Veženem)       |                         | 102                    | 240 | 144 | 248 | 172 | 140 | 272 | 209 | 155 | 290 | 201 |
| EM_314           | Stara Planina – Vartopa (pod Veženem)       |                         | 102                    | 240 | 144 | 248 | 172 | 140 | 272 | 209 | 155 | 290 | 201 |
| EM_315           | Stara Planina – Vartopa (pod Veženem)       |                         | 102                    | 240 | 144 | 248 | 172 | 140 | 272 | 209 | 155 | 290 | 201 |
| EM_316           | Stara Planina – Vartopa (pod Veženem)       |                         | 102                    | 240 | 144 | 248 | 172 | 140 | 272 | 209 | 155 | 290 | 201 |
| EM_317           | Stara Planina – Vartopa (pod Veženem)       |                         | 102                    | 240 | 144 | 248 | 172 | 140 | 272 | 209 | 155 | 290 | 201 |
| EM_368           | Vitosha - between Aleko and Platoto         |                         | 102                    | 244 | 0   | 248 | 178 | 140 | 272 | 239 | 155 | 290 | 201 |
| EM_369           | Vitosha - between Aleko and Platoto         |                         | 102                    | 244 | 0   | 248 | 178 | 140 | 272 | 245 | 0   | 0   | 0   |
| EM_370           | Vitosha - between Aleko and Platoto         |                         | 102                    | 244 | 0   | 248 | 178 | 140 | 272 | 245 | 157 | 290 | 201 |
| EM_374           | Vitosha – 3km S of Zlatni Mostove           |                         | 102                    | 240 | 132 | 248 | 174 | 140 | 275 | 249 | 155 | 290 | 201 |
| EM_375           | Vitosha – 3km S of Zlatni Mostove           |                         | 102                    | 240 | 132 | 248 | 174 | 140 | 275 | 247 | 155 | 290 | 201 |
| EM_371           | Vitosha – above Zvezditsa challet           |                         | 102                    | 240 | 132 | 248 | 174 | 140 | 275 | 189 | 155 | 290 | 201 |
| EM_372           | Vitosha – above Zvezditsa challet           |                         | 102                    | 240 | 0   | 0   | 0   | 140 | 275 | 189 | 155 | 290 | 201 |
| EM_373           | Vitosha – above Zvezditsa challet           |                         | 102                    | 240 | 132 | 248 | 174 | 140 | 275 | 189 | 155 | 290 | 201 |
| EM_365           | Vitosha – Kapaklivec                        |                         | 102                    | 244 | 0   | 248 | 178 | 140 | 272 | 245 | 157 | 290 | 201 |
| EM_366           | Vitosha – Kapaklivec                        |                         | 102                    | 244 | 0   | 248 | 178 | 140 | 272 | 245 | 157 | 290 | 201 |
| EM_367           | Vitosha – Kapaklivec                        |                         | 102                    | 244 | 135 | 248 | 178 | 140 | 272 | 245 | 157 | 290 | 201 |
| EM_382           | Vitoska – between Sredetsa and Lavcheto     |                         | 102                    | 247 | 0   | 248 | 178 | 140 | 272 | 249 | 157 | 290 | 201 |
| EM_383           | Vitoska – between Sredetsa and Lavcheto     |                         | 102                    | 247 | 0   | 248 | 178 | 140 | 272 | 249 | 157 | 290 | 201 |
| EM_318           | Vitoska – Cherni Vrah                       |                         | 102                    | 240 | 144 | 248 | 172 | 140 | 275 | 189 | 155 | 290 | 201 |
| EM_319           | Vitoska – Cherni Vrah                       |                         | 102                    | 240 | 0   | 0   | 0   | 0   | 0   | 0   | 155 | 290 | 201 |
| EM_320           | Vitoska – Cherni Vrah                       |                         | 102                    | 240 | 0   | 0   | 0   | 0   | 0   | 0   | 155 | 290 | 201 |
| EM_321           | Vitoska – Cherni Vrah                       |                         | 102                    | 240 | 144 | 248 | 172 | 140 | 275 | 189 | 155 | 290 | 201 |
| EM_322           | Vitoska – Cherni Vrah                       |                         | 102                    | 240 | 144 | 248 | 172 | 140 | 275 | 189 | 155 | 290 | 201 |
| EM_174           | Borová: Pod Koupalištěm                     |                         | 99                     | 240 | 129 | 248 | 176 | 140 | 268 | 189 | 155 | 290 | 201 |
| EM_175           | Borová: Pod Koupalištěm                     |                         | 99                     | 240 | 129 | 248 | 176 | 140 | 268 | 189 | 155 | 290 | 201 |
| EM_176           | Borová: Pod Koupalištěm                     |                         | 99                     | 240 | 129 | 248 | 176 | 140 | 268 | 189 | 155 | 290 | 201 |
| EM_144           | Borova: Pod nadrazim                        |                         | 102                    | 240 | 138 | 248 | 174 | 140 | 268 | 239 | 155 | 290 | 201 |
| EM_145           | Borova: Pod nadrazim                        |                         | 102                    | 240 | 138 | 248 | 174 | 140 | 268 | 233 | 155 | 290 | 201 |
| EM_146           | Borova: Pod nadrazim                        |                         | 102                    | 240 | 138 | 248 | 174 | 140 | 268 | 239 | 155 | 290 | 201 |
| EM_156           | Buchtovka                                   |                         | 102                    | 244 | 132 | 248 | 172 | 140 | 272 | 235 | 155 | 290 | 201 |
| EM_157           | Buchtovka                                   |                         | 102                    | 244 | 132 | 248 | 172 | 140 | 272 | 235 | 155 | 290 | 201 |
| EM_158           | Buchtovka                                   |                         | 102                    | 244 | 132 | 248 | 172 | 140 | 272 | 235 | 155 | 290 | 201 |
| EM_041           | Častá                                       |                         | 102                    | 225 | 144 | 248 | 172 | 140 | 264 | 189 | 155 | 290 | 201 |
| EM_042           | Častá                                       |                         | 102                    | 225 | 144 | 248 | 172 | 0   | 0   | 0   | 0   | 290 | 201 |
| EM_043           | Častá                                       |                         | 102                    | 225 | 144 | 248 | 172 | 140 | 264 | 189 | 155 | 290 | 201 |
| EM_044           | Častá                                       |                         | 102                    | 225 | 144 | 248 | 172 | 0   | 0   | 0   | 0   | 290 | 201 |
| EM_045           | Častá                                       |                         | 102                    | 225 | 144 | 248 | 172 | 140 | 264 | 189 | 155 | 290 | 201 |
| EM_251           | Častá                                       |                         | 102                    | 225 | 144 | 248 | 172 | 140 | 264 | 189 | 155 | 290 | 201 |
| EM_252           | Častá                                       |                         | 102                    | 225 | 144 | 248 | 172 | 140 | 264 | 189 | 155 | 290 | 201 |
| EM_253           | Častá                                       |                         | 102                    | 225 | 144 | 248 | 172 | 140 | 264 | 189 | 155 | 290 | 201 |
| EM_183           | Čermákovy louky                             |                         | 102                    | 223 | 132 | 248 | 174 | 140 | 268 | 207 | 155 | 290 | 201 |
| EM_184           | Čermákovy louky                             |                         | 102                    | 223 | 132 | 248 | 174 | 140 | 268 | 207 | 155 | 290 | 201 |
| EM_185           | Čermákovy louky                             |                         | 102                    | 223 | 132 | 248 | 174 | 140 | 268 | 207 | 155 | 290 | 201 |
| EM_171           | Damašek                                     |                         | 99                     | 239 | 138 | 248 | 172 | 140 | 268 | 209 | 155 | 290 | 201 |
| EM_172           | Damašek                                     |                         | 99                     | 239 | 138 | 248 | 172 | 140 | 268 | 209 | 155 | 290 | 201 |
| EM_173           | Damašek                                     |                         | 99                     | 239 | 138 | 248 | 172 | 140 | 268 | 209 | 155 | 290 | 201 |
| EM_216           | Filipova Hut                                |                         | 102                    | 240 | 132 | 248 | 174 | 140 | 268 | 189 | 155 | 290 | 201 |
| EM_217           | Filipova Hut                                |                         | 102                    | 240 | 132 | 248 | 174 | 140 | 268 | 189 | 155 | 290 | 201 |
| EM_218           | Filipova Hut                                |                         | 102                    | 240 | 132 | 248 | 174 | 140 | 268 | 189 | 155 | 290 | 201 |
| EM_071           | Chvojnov                                    |                         | 102                    | 235 | 132 | 248 | 172 | 140 | 272 | 189 | 155 | 290 | 201 |
| EM_072           | Chvojnov                                    |                         | 102                    | 235 | 132 | 248 | 172 | 140 | 272 | 189 | 155 | 290 | 201 |
| EM_074           | Chvojnov                                    |                         | 102                    | 235 | 132 | 248 | 172 | 140 | 272 | 189 | 155 | 290 | 201 |
| EM_075           | Chvojnov                                    |                         | 102                    | 235 | 132 | 248 | 172 | 140 | 272 | 189 | 155 | 290 | 201 |
| EM_267           | Chvojnov                                    |                         | 102                    | 235 | 132 | 248 | 172 | 140 | 272 | 189 | 155 | 290 | 201 |

|        |                                | <b>22</b> | <b>10</b> | <b>18</b> | <b>1</b> | <b>9</b> | <b>30</b> | <b>19</b> | <b>14</b> | <b>17</b> | <b>20</b> | <b>29</b> |
|--------|--------------------------------|-----------|-----------|-----------|----------|----------|-----------|-----------|-----------|-----------|-----------|-----------|
| EM_268 | Chvojnov                       | 102       | 235       | 132       | 248      | 172      | 140       | 272       | 189       | 155       | 290       | 201       |
| EM_269 | Chvojnov                       | 102       | 235       | 132       | 248      | 172      | 140       | 272       | 189       | 155       | 290       | 201       |
| EM_187 | Kaliště 2A                     | 99        | 225       | 129       | 248      | 172      | 140       | 272       | 189       | 155       | 290       | 201       |
| EM_285 | Kaliště 2A                     | 99        | 225       | 129       | 248      | 172      | 140       | 272       | 189       | 155       | 290       | 201       |
| EM_286 | Kaliště 2A                     | 99        | 225       | 129       | 248      | 172      | 140       | 272       | 189       | 155       | 290       | 201       |
| EM_189 | Kaliště 2B                     | 102       | 242       | 129       | 248      | 172      | 140       | 268       | 189       | 155       | 290       | 201       |
| EM_190 | Kaliště 2B                     | 102       | 242       | 129       | 248      | 172      | 140       | 268       | 189       | 155       | 290       | 201       |
| EM_191 | Kaliště 2B                     | 102       | 242       | 129       | 248      | 172      | 140       | 268       | 189       | 155       | 290       | 201       |
| EM_141 | Kvilda                         | 99        | 240       | 0         | 248      | 172      | 140       | 268       | 189       | 155       | 293       | 201       |
| EM_142 | Kvilda                         | 99        | 242       | 157       | 248      | 172      | 140       | 272       | 189       | 155       | 290       | 201       |
| EM_143 | Kvilda                         | 99        | 242       | 157       | 248      | 172      | 140       | 272       | 189       | 155       | 290       | 201       |
| EM_195 | Louky u Černého lesa           | 102       | 223       | 132       | 248      | 174      | 140       | 268       | 207       | 155       | 293       | 201       |
| EM_196 | Louky u Černého lesa           | 102       | 223       | 132       | 248      | 174      | 140       | 268       | 207       | 155       | 293       | 201       |
| EM_197 | Louky u Černého lesa           | 102       | 223       | 132       | 248      | 174      | 140       | 268       | 207       | 155       | 293       | 201       |
| EM_201 | Louky u Jeníkova               | 99        | 240       | 129       | 248      | 176      | 140       | 268       | 189       | 155       | 290       | 201       |
| EM_202 | Louky u Jeníkova               | 99        | 240       | 129       | 248      | 176      | 140       | 268       | 189       | 155       | 290       | 201       |
| EM_203 | Louky u Jeníkova               | 99        | 240       | 129       | 248      | 176      | 140       | 268       | 189       | 155       | 290       | 201       |
| EM_348 | Malá Kotlina9                  | 99        | 235       | 129       | 248      | 172      | 140       | 261       | 233       | 155       | 290       | 201       |
| EM_349 | Malá Kotlina9                  | 99        | 235       | 129       | 248      | 172      | 140       | 261       | 233       | 155       | 290       | 201       |
| EM_350 | Malá Kotlina9                  | 99        | 235       | 129       | 248      | 172      | 140       | 261       | 233       | 155       | 290       | 201       |
| EM_351 | Malá Kotlina9                  | 99        | 235       | 129       | 248      | 172      | 140       | 261       | 233       | 155       | 290       | 201       |
| EM_352 | Malá Kotlina9                  | 99        | 235       | 129       | 248      | 172      | 140       | 261       | 233       | 155       | 290       | 201       |
| EM_425 | Malá Kotlina9                  | 99        | 235       | 129       | 248      | 172      | 140       | 261       | 233       | 155       | 290       | 201       |
| EM_065 | Mechové údolí 2                | 0         | 0         | 129       | 248      | 185      | 0         | 0         | 0         | 0         | 0         | 0         |
| EM_257 | Mechové údolí 2                | 0         | 0         | 129       | 248      | 185      | 143       | 275       | 0         | 0         | 0         | 0         |
| EM_258 | Mechové údolí 2                | 0         | 0         | 129       | 248      | 185      | 0         | 0         | 0         | 0         | 0         | 0         |
| EM_207 | Mokřady pod Vlčkem             | 102       | 225       | 132       | 248      | 172      | 140       | 261       | 229       | 155       | 290       | 201       |
| EM_208 | Mokřady pod Vlčkem             | 102       | 225       | 0         | 0        | 0        | 140       | 261       | 0         | 155       | 0         | 201       |
| EM_209 | Mokřady pod Vlčkem             | 102       | 225       | 0         | 0        | 0        | 140       | 261       | 0         | 155       | 0         | 201       |
| EM_129 | Na Oklice                      | 102       | 235       | 132       | 248      | 172      | 140       | 272       | 189       | 155       | 290       | 201       |
| EM_130 | Na Oklice                      | 102       | 235       | 132       | 248      | 172      | 140       | 272       | 189       | 155       | 290       | 201       |
| EM_131 | Na Oklice                      | 102       | 235       | 132       | 248      | 172      | 140       | 272       | 189       | 155       | 290       | 201       |
| EM_192 | Odranec 2 (při cestě a domoch) | 99        | 231       | 129       | 248      | 172      | 140       | 268       | 189       | 155       | 290       | 201       |
| EM_193 | Odranec 2 (při cestě a domoch) | 99        | 231       | 0         | 0        | 0        | 140       | 268       | 189       | 155       | 290       | 201       |
| EM_194 | Odranec 2 (při cestě a domoch) | 99        | 237       | 0         | 0        | 0        | 140       | 272       | 203       | 155       | 290       | 201       |
| EM_076 | Plíčky                         | 102       | 237       | 144       | 248      | 195      | 140       | 275       | 207       | 155       | 290       | 201       |
| EM_077 | Plíčky                         | 102       | 237       | 144       | 248      | 195      | 140       | 275       | 207       | 155       | 290       | 201       |
| EM_078 | Plíčky                         | 102       | 237       | 144       | 248      | 195      | 140       | 275       | 207       | 155       | 290       | 201       |
| EM_079 | Plíčky                         | 102       | 237       | 144       | 248      | 195      | 140       | 275       | 207       | 155       | 290       | 201       |
| EM_080 | Plíčky                         | 102       | 237       | 144       | 248      | 195      | 140       | 275       | 207       | 155       | 290       | 201       |
| EM_056 | Ratajské rybníky               | 99        | 240       | 138       | 248      | 174      | 140       | 261       | 189       | 155       | 290       | 201       |
| EM_057 | Ratajské rybníky               | 99        | 240       | 138       | 248      | 174      | 140       | 261       | 189       | 155       | 290       | 201       |
| EM_058 | Ratajské rybníky               | 99        | 240       | 138       | 248      | 174      | 140       | 261       | 189       | 155       | 290       | 201       |
| EM_059 | Ratajské rybníky               | 99        | 240       | 138       | 248      | 174      | 140       | 261       | 189       | 155       | 290       | 201       |
| EM_060 | Ratajské rybníky               | 99        | 240       | 138       | 248      | 174      | 140       | 261       | 189       | 155       | 290       | 201       |
| EM_046 | Řeka2                          | 102       | 240       | 132       | 248      | 172      | 140       | 261       | 189       | 155       | 290       | 201       |
| EM_047 | Řeka2                          | 102       | 240       | 132       | 248      | 172      | 140       | 261       | 189       | 155       | 290       | 201       |
| EM_048 | Řeka2                          | 102       | 240       | 132       | 248      | 172      | 140       | 261       | 189       | 155       | 290       | 201       |
| EM_049 | Řeka2                          | 102       | 240       | 132       | 248      | 172      | 140       | 261       | 189       | 155       | 290       | 201       |
| EM_050 | Řeka2                          | 102       | 240       | 132       | 248      | 172      | 140       | 261       | 189       | 155       | 290       | 201       |
| EM_108 | Suchdolské rašeliniště         | 102       | 242       | 129       | 248      | 174      | 140       | 268       | 189       | 155       | 290       | 201       |
| EM_109 | Suchdolské rašeliniště         | 99        | 244       | 141       | 248      | 172      | 140       | 268       | 189       | 155       | 290       | 201       |
| EM_110 | Suchdolské rašeliniště         | 102       | 242       | 129       | 248      | 174      | 140       | 268       | 189       | 155       | 290       | 201       |
| EM_165 | Suchopýrek                     | 99        | 225       | 132       | 248      | 174      | 140       | 268       | 221       | 155       | 290       | 201       |
| EM_166 | Suchopýrek                     | 99        | 225       | 132       | 248      | 174      | 140       | 268       | 221       | 155       | 290       | 201       |
| EM_167 | Suchopýrek                     | 99        | 225       | 132       | 248      | 174      | 140       | 268       | 221       | 155       | 290       | 201       |
| EM_198 | Šimanovské rašeliniště         | 99        | 240       | 132       | 248      | 172      | 140       | 268       | 189       | 155       | 290       | 201       |
| EM_199 | Šimanovské rašeliniště         | 99        | 240       | 132       | 248      | 172      | 140       | 268       | 189       | 155       | 290       | 201       |
| EM_200 | Šimanovské rašeliniště         | 99        | 240       | 132       | 248      | 172      | 140       | 268       | 189       | 155       | 290       | 201       |
| EM_051 | Švábov                         | 99        | 225       | 129       | 248      | 172      | 140       | 272       | 189       | 155       | 290       | 201       |
| EM_053 | Švábov                         | 99        | 225       | 129       | 248      | 172      | 140       | 272       | 189       | 155       | 290       | 201       |
| EM_054 | Švábov                         | 99        | 225       | 129       | 248      | 172      | 140       | 272       | 189       | 155       | 290       | 201       |
| EM_055 | Švábov                         | 99        | 225       | 129       | 248      | 172      | 140       | 272       | 189       | 155       | 290       | 201       |
| EM_254 | Švábov                         | 99        | 225       | 129       | 248      | 172      | 140       | 272       | 189       | 155       | 290       | 201       |
| EM_255 | Švábov                         | 99        | 225       | 129       | 248      | 172      | 140       | 272       | 189       | 155       | 290       | 201       |
| EM_256 | Švábov                         | 99        | 225       | 129       | 248      | 172      | 140       | 272       | 189       | 155       | 290       | 201       |
| EM_168 | Trhová Kamenice2               | 102       | 240       | 144       | 248      | 172      | 140       | 268       | 189       | 155       | 290       | 201       |
| EM_169 | Trhová Kamenice2               | 102       | 240       | 144       | 248      | 172      | 140       | 268       | 189       | 155       | 290       | 201       |
| EM_170 | Trhová Kamenice2               | 102       | 242       | 132       | 248      | 172      | 140       | 272       | 189       | 155       | 290       | 201       |
| EM_117 | V Lísovech                     | 102       | 240       | 132       | 248      | 172      | 140       | 272       | 237       | 155       | 290       | 201       |
| EM_118 | V Lísovech                     | 102       | 240       | 132       | 248      | 172      | 140       | 272       | 237       | 155       | 290       | 201       |
| EM_119 | V Lísovech                     | 102       | 240       | 132       | 248      | 172      | 140       | 272       | 237       | 155       | 290       | 201       |
| EM_180 | V Rájích                       | 102       | 240       | 138       | 248      | 172      | 140       | 272       | 239       | 155       | 290       | 201       |
| EM_181 | V Rájích                       | 102       | 240       | 138       | 248      | 172      | 140       | 272       | 239       | 155       | 290       | 201       |
| EM_182 | V Rájích                       | 102       | 240       | 138       | 248      | 172      | 140       | 272       | 239       | 155       | 290       | 201       |
| EM_356 | Velká kotlina1                 | 99        | 225       | 144       | 248      | 172      | 140       | 261       | 235       | 155       | 290       | 201       |
| EM_357 | Velká kotlina1                 | 99        | 225       | 0         | 0        | 0        | 140       | 261       | 235       | 155       | 290       | 201       |
| EM_358 | Velká kotlina1                 | 99        | 225       | 0         | 248      | 172      | 140       | 261       | 235       | 155       | 290       | 201       |
| EM_430 | Velká kotlina1                 | 99        | 225       | 144       | 248      | 172      | 140       | 261       | 235       | 155       | 290       | 201       |
| EM_353 | Velká kotlina2                 | 99        | 240       | 132       | 248      | 172      | 140       | 272       | 189       | 155       | 290       | 201       |
| EM_354 | Velká kotlina2                 | 99        | 240       | 0         | 0        | 0        | 140       | 272       | 189       | 155       | 290       | 201       |
| EM_355 | Velká kotlina2                 | 99        | 240       | 132       | 248      | 172      | 140       | 272       | 189       | 155       | 290       | 201       |
| EM_333 | Velká kotlina3                 | 99        | 240       | 0         | 0        | 0        | 140       | 268       | 0         | 0         | 290       | 201       |
| EM_334 | Velká kotlina3                 | 99        | 240       | 0         | 0        | 0        | 140       | 268       | 0         | 0         | 290       | 201       |
| EM_335 | Velká kotlina3                 | 99        | 240       | 0         | 0        | 0        | 140       | 268       | 0         | 0         | 290       | 201       |
| EM_336 | Velká kotlina3                 | 99        | 240       | 144       | 248      | 172      | 140       | 268       | 189       | 155       | 290       | 201       |
| EM_337 | Velká kotlina3                 | 99        | 240       | 144       | 248      | 172      | 140       | 268       | 189       | 155       | 290       | 201       |
| EM_423 | Velká kotlina3                 | 99        | 240       | 141       | 248      | 172      | 140       | 268       | 189       | 155       | 290       | 201       |
| EM_162 | Vortová: Návesník              | 102       | 242       | 144       | 248      | 174      | 140       | 261       | 209       | 155       | 290       | 201       |
| EM_163 | Vortová: Návesník              | 102       | 242       | 144       | 248      | 174      | 140       | 261       | 209       | 155       | 290       | 201       |
| EM_164 | Vortová: Návesník              | 102       | 242       | 144       | 248      | 174      | 140       | 261       | 209       | 155       | 290       | 201       |



|         |                           | <b>22</b> | <b>10</b> | <b>18</b> | <b>1</b> | <b>9</b> | <b>30</b> | <b>19</b> | <b>14</b> | <b>17</b> | <b>20</b> | <b>29</b> |
|---------|---------------------------|-----------|-----------|-----------|----------|----------|-----------|-----------|-----------|-----------|-----------|-----------|
| EM_421  | Canada/British columbia3  | 102       | 223       | 135       | 248      | 199      | 140       | 268       | 235       | 155       | 293       | 201       |
| EM_398  | Canada/New Brunswick      | 106       | 230       | 129       | 248      | 0        | 143       | 266       | 197       | 0         | 0         | 0         |
| EM_399  | Canada/New Foundland      | 102       | 244       | 129       | 248      | 172      | 140       | 268       | 213       | 157       | 290       | 201       |
| EM_396  | Canada/Quebec             | 0         | 0         | 132       | 248      | 165      | 136       | 266       | 203       | 0         | 286       | 201       |
| EM_395  | Canada/Yukon              | 102       | 240       | 138       | 248      | 172      | 140       | 264       | 233       | 155       | 286       | 201       |
| EM_388  | Finland1                  | 99        | 223       | 129       | 248      | 172      | 140       | 268       | 189       | 155       | 290       | 201       |
| EM_387  | Finland2                  | 102       | 237       | 138       | 248      | 197      | 140       | 261       | 189       | 155       | 290       | 201       |
| ST_580  | Finland3                  | 102       | 225       | 144       | 248      | 172      | 140       | 264       | 207       | 155       | 284       | 201       |
| EM_391  | Japan                     | 106       | 231       | 132       | 248      | 0        | 143       | 266       | 235       | 155       | 279       | 194       |
| ST_1310 | Luxembourg                | 99        | 227       | 132       | 243      | 183      | 123       | 261       | 189       | 152       | 279       | 194       |
| EM_390  | Norway2                   | 102       | 233       | 132       | 248      | 185      | 127       | 258       | 197       | 159       | 290       | 198       |
| ST_71   | Trondelag                 | 102       | 225       | 138       | 248      | 172      | 140       | 264       | 189       | 157       | 290       | 201       |
| EM_120  | Rospuda basin, Szczebecka | 99        | 240       | 129       | 248      | 172      | 140       | 272       | 189       | 155       | 290       | 201       |
| EM_121  | Rospuda basin, Szczebecka | 99        | 240       | 129       | 248      | 172      | 140       | 272       | 189       | 0         | 290       | 0         |
| EM_122  | Rospuda basin, Szczebecka | 99        | 240       | 129       | 248      | 172      | 140       | 272       | 189       | 155       | 290       | 0         |
| EM_392  | Pologne                   | 86        | 259       | 132       | 248      | 185      | 140       | 255       | 193       | 155       | 293       | 194       |
| ST_73   | Ayon Island               | 109       | 247       | 138       | 248      | 185      | 147       | 272       | 249       | 155       | 293       | 210       |
| ST_74   | Wrangel Island1           | 109       | 261       | 132       | 248      | 180      | 147       | 266       | 247       | 157       | 293       | 222       |
| ST_75   | Wrangel Island2           | 109       | 259       | 132       | 248      | 180      | 147       | 0         | 247       | 0         | 293       | 222       |
| EM_393  | Spain                     | 99        | 242       | 135       | 248      | 172      | 140       | 268       | 189       | 155       | 290       | 201       |
| ST_72   | Jamtlad                   | 102       | 237       | 138       | 248      | 172      | 140       | 261       | 231       | 155       | 284       | 201       |
| EM_389  | Sweden1                   | 102       | 223       | 144       | 248      | 178      | 140       | 275       | 189       | 155       | 290       | 201       |
| EM_384  | Switzerland               | 102       | 253       | 138       | 248      | 197      | 140       | 268       | 189       | 155       | 290       | 201       |
| ST_70   | Berwickshire              | 102       | 223       | 129       | 248      | 172      | 140       | 275       | 189       | 155       | 290       | 201       |
| ST_371  | USA/Alaska                | 109       | 257       | 135       | 248      | 0        | 140       | 0         | 221       | 159       | 284       | 201       |
| EM_420  | USA/Alaska                | 99        | 225       | 144       | 248      | 172      | 140       | 275       | 189       | 155       | 290       | 201       |
| EM_410  | USA/Connecticut           | 102       | 235       | 129       | 248      | 172      | 140       | 268       | 207       | 155       | 293       | 204       |
| EM_411  | USA/Idaho                 | 102       | 240       | 129       | 248      | 172      | 140       | 268       | 229       | 155       | 295       | 201       |
| ST_1312 | USA/Maine                 | 102       | 235       | 129       | 248      | 172      | 140       | 268       | 233       | 155       | 290       | 201       |
| EM_404  | USA/Maine                 | 99        | 242       | 138       | 248      | 172      | 127       | 275       | 209       | 155       | 290       | 201       |
| ST_1311 | USA/Michigan              | 99        | 240       | 129       | 248      | 172      | 140       | 264       | 189       | 155       | 293       | 201       |
| EM_405  | USA/Minnessota            | 102       | 0         | 138       | 248      | 199      | 140       | 268       | 233       | 155       | 290       | 201       |
| EM_406  | USA/New Hampshire         | 99        | 227       | 138       | 248      | 172      | 140       | 268       | 215       | 155       | 286       | 198       |
| EM_407  | USA/New Jersey            | 99        | 240       | 138       | 248      | 172      | 140       | 275       | 189       | 155       | 290       | 201       |
| EM_408  | USA/Oregon                | 102       | 242       | 129       | 248      | 172      | 140       | 268       | 207       | 155       | 290       | 198       |
| ST_1322 | USA/South Carolina        | 0         | 0         | 138       | 0        | 169      | 136       | 266       | 191       | 0         | 284       | 198       |
| EM_402  | USA/Utah                  | 102       | 225       | 129       | 248      | 0        | 127       | 268       | 235       | 155       | 293       | 201       |
| EM_403  | USA/Vermont               | 102       | 240       | 129       | 248      | 172      | 127       | 268       | 219       | 155       | 290       | 201       |
| EM_429  | USA/Wyoming/Yellowstone2  | 102       | 242       | 138       | 248      | 172      | 140       | 275       | 221       | 155       | 293       | 201       |
| EM_418  | USA/Wyoming1              | 99        | 220       | 129       | 248      | 172      | 140       | 275       | 207       | 155       | 290       | 201       |
| EM_412  | USA/Wyoming2              | 99        | 220       | 129       | 248      | 172      | 140       | 275       | 207       | 155       | 290       | 201       |
| EM_413  | USA/Wyoming3              | 99        | 220       | 129       | 248      | 172      | 140       | 275       | 207       | 0         | 290       | 0         |
| EM_416  | USA/Wyoming4              | 99        | 220       | 129       | 248      | 172      | 140       | 275       | 207       | 155       | 290       | 201       |
| EM_417  | USA/Wyoming4              | 99        | 220       | 129       | 248      | 172      | 140       | 275       | 207       | 155       | 290       | 201       |
| EM_419  | USA/Wyoming5              | 99        | 220       | 129       | 248      | 172      | 140       | 275       | 207       | 155       | 290       | 201       |
| EM_414  | USA/Wyoming6              | 99        | 235       | 129       | 248      | 172      | 140       | 278       | 219       | 155       | 290       | 201       |
| EM_415  | USA/Wyoming7              | 99        | 220       | 129       | 248      | 172      | 140       | 275       | 207       | 155       | 290       | 201       |
